# Supplementary material
Source: PubMed Central journal article supplement (PMC3808598)
Supplement: 1311016110_pnas.201311016SI.pdf [file 1311016110_pnas.201311016SI.pdf]

# Supporting Information

Schaer et al. 10.1073/pnas.1311016110

## SI Materials and Methods

**Field Sampling.** Bats were captured in a broad range of habitats, including ravine forest, submontane grassland, submontane forest, evergreen lowland forest, and savannas during the dry season between November and December 2006 in Côte d'Ivoire, in December 2008 in Guinea (Convention on International Trade in Endangered Species Exportation permits 449 and 450), and between November and December 2010 in Liberia (Permit no. AMD/030/053–11) (Fig. 1, Fig. S1, and Table S2). Different types of mist nets were used at ground and canopy level. We took forearm length (in millimeter) and body mass (in grams) of all individuals, as well as standard measurements of voucher specimens (head and body, tail, ear, hind foot, tibia). Reproductive status, age class, and sex (1) were additionally recorded. All techniques used for capture and preservation complied with standard methods for measuring and monitoring mammal diversity (2). For field identification of bat species, a number of identification keys were used, mainly Rosevear (3) and Hayman and Hill (4). Taxonomy follows Simmons (5) and Nesi (6) except for *Miniopterus villiersi* and *Pipistrellus* aff. *grandidieri*. Koopman (7) lists *M. villiersi* as a subspecies of *Miniopterus schreibersii*, but genetic results indicate cryptic diversity (8) and West African populations probably represent a distinct species. The West African *Pipistrellus* aff. *grandidieri* might represent a yet undescribed species (9).

Blood samples were obtained from a puncture of either the antebrachial or interfemoral vein. Blood sampling followed approved animal care and protocols (1). Our study adhered to the guidelines of the American Society of Mammalogists for the use of wild mammals in research (1, 2). For morphological identification of the parasites, thin blood smears were prepared. Wing punches were collected from each captured individual using the nonlethal method after Worthington Wilmer and Barratt (10) and stored in 90% (vol/vol) ethanol. Wing punches, blood dots on filter paper, or an aliquot of the blood smear sample were used for subsequent molecular analysis. The majority of captured bats were released at the field sites, and only few voucher specimens were collected to document species occurrences and verify identifications. These specimens are deposited in the Zoological Museum A. Koenig (specimens from Guinea) and the research collection of J. Fahr (Liberia and Côte d'Ivoire).

**Microscopy.** Thin blood smears were fixed in 100% (vol/vol) methanol and stained with the Romanowsky–Giemsa staining and examined for blood parasites via light microscopy at a magnification of 1,000 $\times$  for a minimum of 15 min. Examinations were repeated at least once to minimize false-negative records. The entire slide was scanned for asexual and sexual blood stages. Pictures of infected erythrocytes were processed using the SPOT Imaging Solutions software or Imaging for Windows. Parasitemias were recorded for each infected bat (Table S1) as follows. For each slide, an average number of erythrocytes per field was calculated by counting total erythrocytes observed in two fields and dividing by 2. Then, the number of parasites was counted across 40 fields of the slide or until one parasite cell was observed. Parasitemia is given as number of parasites per total estimated erythrocyte number. All positive samples were used for further genetic work.

**DNA Extraction, Amplification, and Sequencing.** All positive samples were subjected to parasite genotyping. A representative portion of the blood smear-negative samples was screened via PCR for confirmation. DNA was extracted from dried blood dots, wing

punches, or blood that was scraped off the blood smear slides using the DNeasy extraction kit (Qiagen). The protocol for animal tissues was performed following the manufacturer's protocol with minor modifications. Samples were eluted in 50- $\mu$ L buffer AE. PCR was performed using illustra\* PuRe Taq Ready-To-Go PCR beads (GE Health Sciences), 2  $\mu$ L of genomic DNA as template, and 1  $\mu$ L of 10 mM of each primer. Because of the diversity of the taxa being studied, many novel primers were designed for this project and multiple combinations were tried to obtain optimal sequence reads. Occasionally, nested PCRs were performed, following previously published protocols (11, 12). All primers are listed in Table S3. PCR fragments were sequenced in both directions using BigDye v3.0 (Applied Biosystems) using the manufacturer's protocol and the original sequencing primers, and run on an ABI3730xl sequencer. Sequences included 1,823 nt of mitochondrial DNA [986 nt of the cytochrome *b* (*cytb*) and 837 nt of the cytochrome oxidase I (*cox1*) genes], 576 nt of the apicoplast caseinolytic protease (*clpc*) gene, and 523 nt of the nuclear elongation factor 2 (*ef2a*) gene. For chiropteran *Plasmodium* samples, additional sequences included 900 nt of *Actin1* (*act1*), 619 nt of *Actin2* (*act2*), 211 nt of adenylosuccinate lyase (*asl*), 667 nt of cysteine proteinase (*cyspro*), 596 nt of dihydrofolate reductase/thymidylate synthase (*dhfr/ts*), 356 nt of histone H2A, 460 nt of inosine monophosphate-dehydrogenase (*InMPDH*), 464 nt of ookinete surface protein (*P25*), and 454 nt of poly-ubiquitin (*UBI*).

## SI Results

**Parasite Classification. *Plasmodium voltaicum*.** The growing gametocyte features a nucleus that is surrounded by a clear more transparent zone and pigment granules are visible in the cytoplasm (Fig. 3A and Fig. S3A). Other characteristics include: (i) the typical location of the nucleus at the margin of the parasite, (ii) a weaker staining of the microgametocyte cytoplasm compared with the macrogametocyte, (iii) an ambiguous boundary of the microgametocyte nucleus that occupies a large area of the parasite, and (iv) enlargement of erythrocytes that are occupied by mature gametocytes.

***Plasmodium cyclopsi*.** Thin and fragile young ring forms were found in infected blood, with a vacuole limited by a narrow border of cytoplasm and a relatively large nucleus, resembling the description by Landau and Chabaud (13) (Fig. 3A). Schizonts are very compact, with small dense nuclei and a mass of granules that occasionally contain a large grain of black pigment. There were usually eight nuclei, although occasionally only six nuclei (Fig. S3B).

***Polychromophilus*.** The parasite blood stages of *Polychromophilus* sp. are limited to gametocytes. When mature, these gametocytes fill the erythrocyte completely and cause a slight enlargement and a round or often oval-shaped form of the host cell with fine yellow-brown pigment grains scattered in the cytoplasm. The macrogametocyte features purple-blue-stained cytoplasm and a small distinct nucleus that is placed eccentrically and stains pink (Fig. 3B and Fig. S3C).

***Nycteria*.** Only sexual stages were found in the blood, almost exclusively representing growing gametocytes. When immature, the gametocytes possess an oval shape (Fig. 3C and Fig. S3D and E). Later, gametocytes adopt a spherical shape, and the brown pigment granules become scattered in the cytoplasm or are assembled in small groups. The growing forms feature a diffuse nucleus area, which only becomes homogeneous after maturity. Garnham and Heisch (14) described a well-condensed nucleus in fully mature gametocytes. However, we did not observe fully

mature stages in our samples. Thus, it was difficult to distinguish the sexes of the gametocytes without the characteristic staining of these stages (14). The gametocytes found in *Rhinolophus alcyone* and *Rhinolophus landeri* resemble each other to a high degree. Both are oval-shaped parasites and contain several dark-stained granules, but no definite nucleus area. The cytoplasm does not appear amoeboid, and the parasite does not fill the entire erythrocyte. Hence, the host-cell margin remains detectable, even at the mature gametocyte stage, and the outline of the parasite membrane is clearly visible. The main morphological diagnostic features for species of *Nycteria* are the size and shape of the schizonts (15). Because in the present study only blood stages were available for morphological comparisons, parasites could not be classified further to the species level. We assigned the parasites found in *R. alcyone* and *R. landeri* to the genus *Nycteria* on the basis of the morphology of the gametocytes and due to their grouping as a distinct clade outside the *Hepatocystis*, *Plasmodium*, and *Polychromophilus* clades.

**Hepatocystis.** Blood stages of *Hepatocystis* spp. are limited to gametocyte stages and hemozoin was present in all infected erythrocytes (Fig. 3D and Fig. S3 F–O). In the majority of cases, the infectious stages found in the blood smears were fully mature gametocytes. The youngest forms were very small red-staining chromatin dots, as described by Desowitz (16) from *Hepatocystis*

in monkeys. The more developed stages showed a solid nucleus and cytoplasm and appeared as rings resembling those of *Plasmodium* (Fig. 3D). The sexually dimorphic micro- and macrogametocytes were distinguished after Giemsa staining. The microgametocytes featured pale brown cytoplasm with evenly distributed hemozoin granules. The nucleus consisted of a large portion that stained light red, and a smaller part within staining dense dark red. No granules were visible in the nuclear zone. The macrogametocytes, in contrast, stained blue, with a red staining nucleus of much smaller size in comparison with the nucleus of the microgametocyte. Pigment granules were dispersed in the whole cytoplasm. The appearance and size of the digestive vacuoles differed from total absence (Fig. S3G) to small size (Fig. S3 F, I, and J) and to vacuoles, which almost filled two quarter of the parasite (Fig. S3 M and N). Deformations of the host cells were common, resulting in amoeboid cell forms (Fig. S3 K and L). The morphology of the parasites isolated in the present study from *Epomops buettikoferi*, *Nanonycteris veldkampii*, *Micropteropus pusillus*, and *Epomophorus gambianus* is consistent with *Hepatocystis epomophori* (15). We note that the sequences of *Hepatocystis* species isolated from *Myonycteris leptodon* in Liberia display minor phylogenetic distances to the “*H. epomophori*” group and might therefore represent a distinct species.

- Kunz TH, Parsons S (2009) *Ecological and Behavioral Methods for the Study of Bats*, eds Kunz TH, Parsons S (Johns Hopkins Univ Pr, Baltimore), 2nd Ed.
- Sikes RS, Gannon WL (2011) Animal Care and Use, Committee of the ASM, 2011. *J Mammal* 92:235–253.
- Rosevear DR (1965) *The Bats of West Africa* [Trustees of the British Museum (Natural History), London].
- Hayman RW, Hill JE (1971) *The Mammals of Africa, an Identification Manual*, eds Meester J, Setzer HW (Smithsonian Institution, Washington), pp 1–73.
- Simmons NB (2005) *Mammal Species of the World: A Taxonomic and Geographic Reference, 3rd*, eds Wilson D, Reeder DM (Johns Hopkins Univ Press, Baltimore), pp 312–529.
- Nesi N, et al. (2013) Molecular systematics and phylogeography of the tribe Myonycterini (Mammalia, Pteropodidae) inferred from mitochondrial and nuclear markers. *Mol Phylogenet Evol* 66(1):126–137.
- Koopman KF (1965) Status of forms described or recorded by J.A. Allen in “The American Museum Congo Expedition Collection of Bats.”. *American Museum Novitates* no. 2219, eds Koopman KF, Allen JA, Lang H, Chapin JP (American Museum of Natural History, New York), pp 1–34.
- Appleton BR, McKenzie JA, Christidis L (2004) Molecular systematics and biogeography of the bent-wing bat complex *Miniopterus schreibersii* (Kuhl, 1817) (Chiroptera:Vespertilionidae). *Mol Phylogenet Evol* 31(2):431–439.
- Monadjem A, Fahr J (2007) *A Rapid Biological Assessment of North Loma, Gola and Grebo National Forests, Liberia*, eds Hoke P, Demey R, Peal A (Conservation International, Arlington, VA), pp 47–58 and 101–106.
- Worthington Wilmer J, Barratt E (1996) A non-lethal method of tissue sampling for genetic studies of chiropterans. *Bat Research News* 37(1):1–3.
- Perkins SL, Sarkar IN, Carter R (2007) The phylogeny of rodent malaria parasites: simultaneous analysis across three genomes. *Infect Genet Evol* 7(1):74–83.
- Perkins SL, Austin CC (2009) Four new species of *Plasmodium* from New Guinea lizards: Integrating morphology and molecules. *J Parasitol* 95(2):424–433.
- Landau II, Chabaud AG (1978) [Description of *P. cyclopsi* n. sp. a parasite of the microchiropteran bat *Hipposideros cyclops* in Gabon (author's transl)]. *Ann Parasitol Hum Comp* 53(3):247–253.
- Garnham PCC, Heisch RB (1953) On a new blood parasite of insectivorous bats. *Trans R Soc Trop Med Hyg* 47(5):357–363.
- Garnham PCC (1966) *Malaria Parasites and Other Haemosporidia* (Blackwell Scientific, Oxford).
- Desowitz R (1970) Observations on the *Heptocystis* of the White-Cheeked Gibbon (*Hylobates concolor*). *J Parasitol* 56(3):444–446.

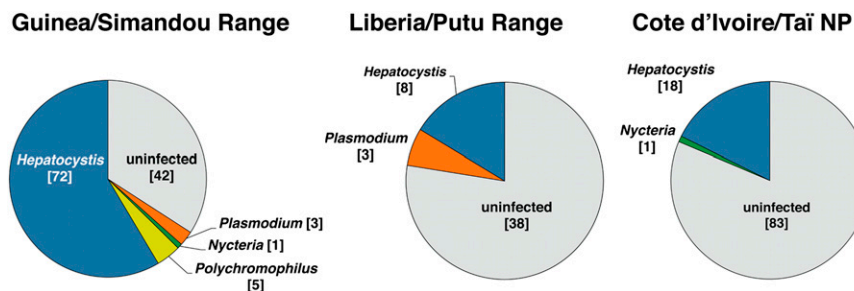

**Fig. S1.** Prevalences of hemsporidian genera across collecting sites. The pie charts for each country show the numbers of bat individuals that are infected with the respective hemsporidian parasite genus.

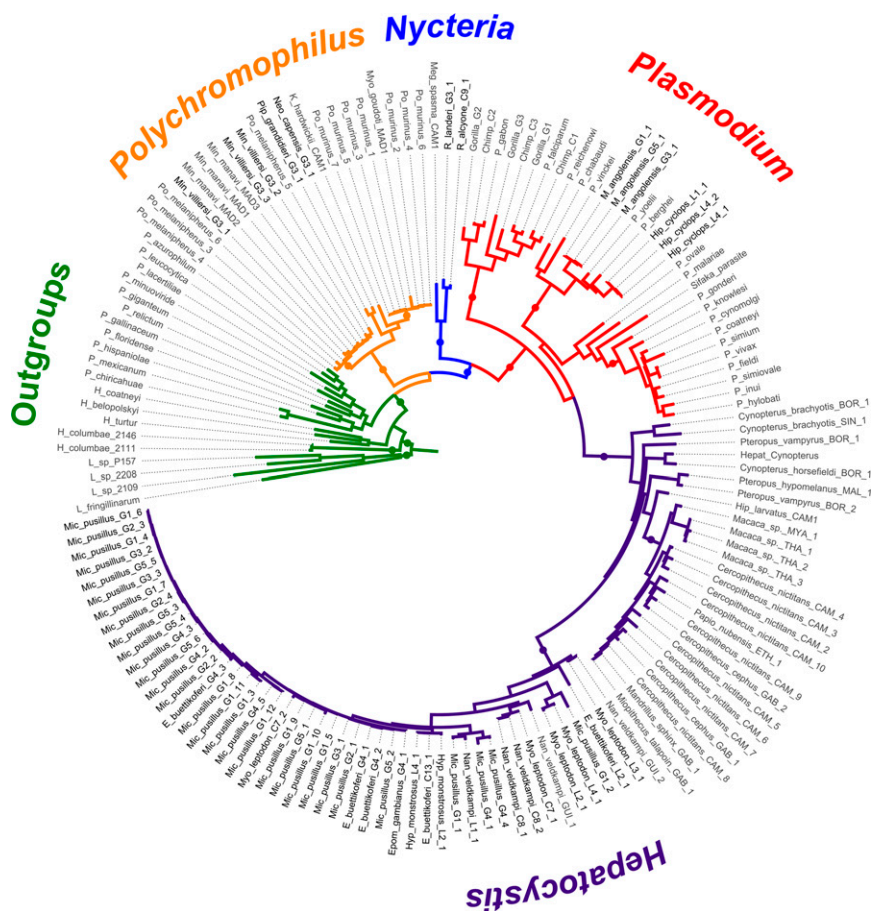

Fig. S2. Maximum-likelihood phylogeny of bat hemsporidian parasites in broad context of previously published sequences. Maximum-likelihood phylogeny of novel isolates of West African bat malaria parasites (black type) within context of large set of previously published taxa (gray type). Phylogeny was constructed with partitioned analysis of mitochondrial (*cytb*, *cox1*), apicoplast (*clpc*), and nuclear (*ef2a*) genes, rooted with *Leucocytozoon* taxa. Bootstrap support values  $\geq 90\%$  on key clades indicated with a dot.

*Plasmodium voltaicum*  
(ex *Myonycteris angolensis*)

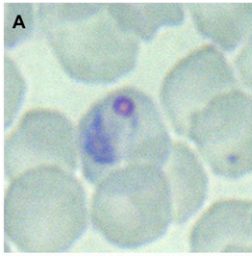

*Plasmodium cyclopsi*  
(ex *Hipposideros cyclops*)

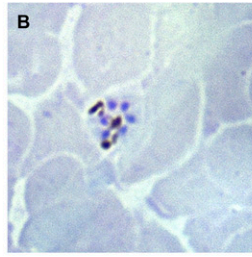

*Polychromophilus* sp.  
(ex *Neoromicia capensis*)

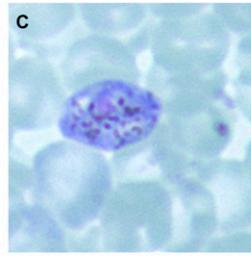

*Nycteria* sp.  
(ex *Rhinolophus alcyone*)

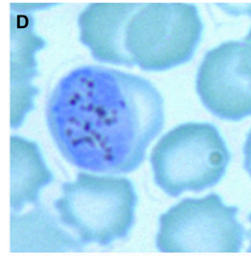

*Nycteria* sp.  
(ex *Rhinolophus alcyone*)

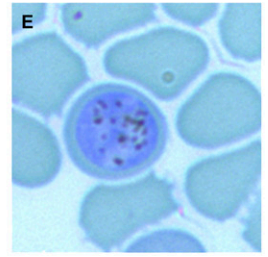

*Hepatocystis* sp.  
(ex *Epomophorus gambianus*)

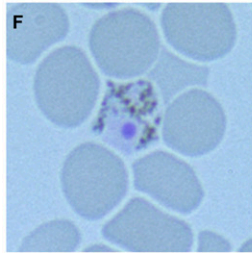

*Hepatocystis* sp.  
(ex *Epomophorus gambianus*)

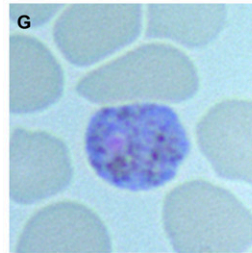

*Hepatocystis* sp.  
(ex *Hypsignathus monstrosus*)

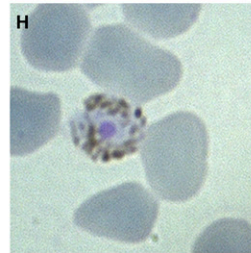

*Hepatocystis* sp.  
(ex *Epomops buettikoferi*)

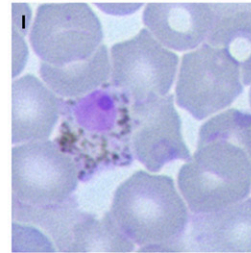

*Hepatocystis* sp.  
(ex *Nanonycteris veldkampii*)

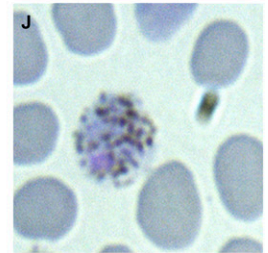

*Hepatocystis* sp.  
(ex *Myonycteris leptodon*)

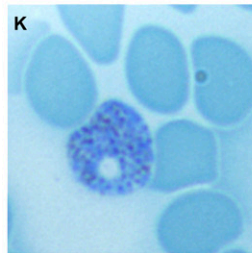

*Hepatocystis* sp.  
(ex *Myonycteris leptodon*)

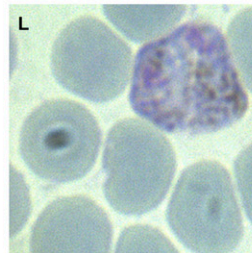

*Hepatocystis* sp.  
(ex *Myonycteris leptodon*)

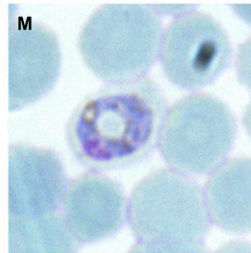

*Hepatocystis* sp.  
(ex *Myonycteris leptodon*)

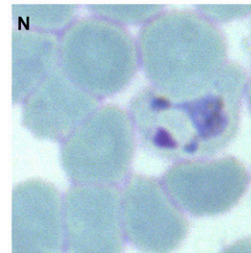

*Hepatocystis* sp.  
(ex *Myonycteris leptodon*)

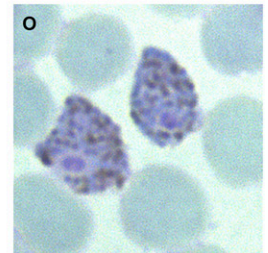

**Fig. S3.** Representative micrographs from Giemsa-stained blood films of infected Chiroptera. The parasite genus/species and the associated hosts are listed above the respective pictures. Sizes of erythrocytes of bats vary between 5 and 6.4  $\mu\text{m}$  in diameter. Gametocytes slightly enlarge the host cells up to about 7  $\mu\text{m}$ . (A) Growing gametocyte of *Plasmodium voltaicum*. (B) *Plasmodium cyclopsi* schizont including six nuclei. (C) Mature gametocyte stage of *Polychromophilus*, causing a round or oval-shaped form of the erythrocyte with yellow-brown pigment grains scattered in the cytoplasm. (D and E) Growing gametocytes of *Nycteria*. Note the rounded gametocytes that are not fully grown yet and the coarse grained hemozoin. (F, H–J) Male microgametocytes of *Hepatocystis* sp. (G, K, L, and O) female macrogametocytes of *Hepatocystis* sp. Note the double-infected erythrocyte in picture L. (M and N) Ring stages of *Hepatocystis* sp. Ring stages resemble *Plasmodium* ring stages, but show a larger nucleus. Micrographs were taken at 1,000 $\times$  magnification.

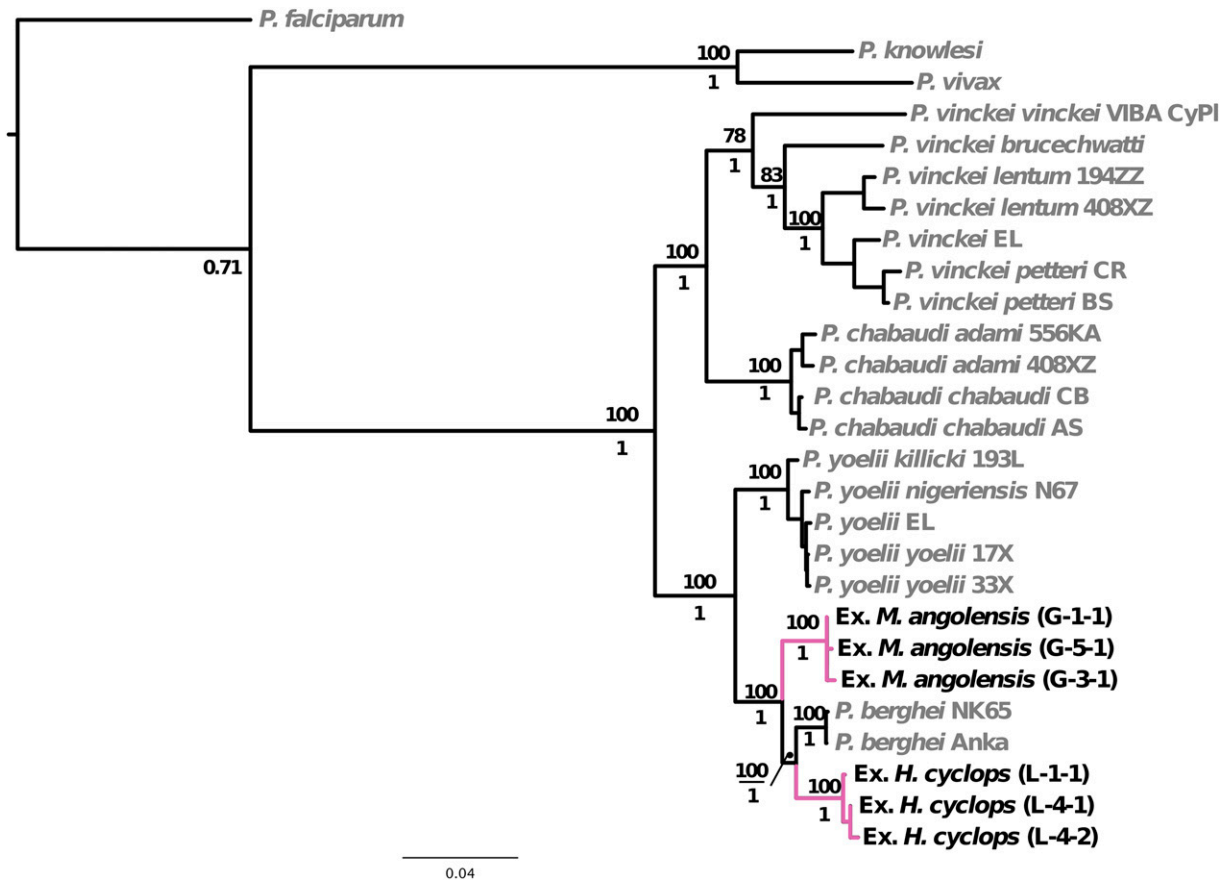

**Fig. S4.** Bat *Plasmodium* in context of 18 rodent *Plasmodium* lineages. Thirteen-gene maximum-likelihood phylogeny for the bat *Plasmodium* taxa from this study and rodent *Plasmodium* species, subspecies, and strains, including two *Plasmodium berghei*, five *Plasmodium yoelii*, four *Plasmodium chabaudi*, and seven *Plasmodium vinckeii* lineages. Bootstrap support values above nodes and Bayesian posterior probability values are below nodes.

**Table S1. Parasitemia, sex, and age of parasite-positive individuals**

| Parasite genus                 | Host species                         | Date collected*               | Code <sup>†</sup>             | Sex         | Age <sup>‡</sup>  | Parasitemia (%) <sup>§</sup> |                   |         |
|--------------------------------|--------------------------------------|-------------------------------|-------------------------------|-------------|-------------------|------------------------------|-------------------|---------|
| <i>Polychromophilus</i>        | <i>Miniopterus villiersi</i>         | 12 Dec 2008                   | G-3-2                         | F           | Adult             | 0.03                         |                   |         |
|                                |                                      | 12 Dec 2008                   | G-3-3                         | M           | Adult             | < 0.001                      |                   |         |
|                                |                                      | 13 Dec 2008                   | G-3-1                         | F           | Adult             | < 0.001                      |                   |         |
| <i>Plasmodium</i>              | <i>Neoromicia capensis</i>           | 12 Dec 2008                   | G-3-1                         | M           | Adult             | < 0.001                      |                   |         |
|                                | <i>Pipistrellus aff. grandidieri</i> | 12 Dec 2008                   | G-3-1                         | F           | Adult             | 0.02                         |                   |         |
|                                | <i>Hipposideros cyclops</i>          | 21 Nov 2010                   | L-4-2                         | F           | Adult             | 0.007                        |                   |         |
|                                |                                      | 21 Nov 2010                   | L-4-1                         | M           | Adult             | 0.008                        |                   |         |
|                                |                                      | 01 Dec 2010                   | L-1-1                         | M           | Adult             | +                            |                   |         |
| <i>Myonycteris angolensis</i>  | 04 Dec 2008                          | G-1-1                         | M                             | Adult       | < 0.001           |                              |                   |         |
| <i>Nycteria</i>                | <i>Rhinolophus alcyone</i>           | 10 Dec 2008                   | G-5-1                         | F           | Adult             | < 0.001                      |                   |         |
|                                |                                      | 14 Dec 2008                   | G-3-1                         | F           | Adult             | < 0.001                      |                   |         |
|                                |                                      | 19 Nov 2006                   | C-9-1                         | M           | Adult             | 0.03                         |                   |         |
|                                |                                      | 14 Dec 2008                   | G-3-1                         | M           | Adult             | < 0.001                      |                   |         |
| <i>Hepatocystis</i>            | <i>Epomophorus gambianus</i>         | 19 Dec 2008                   | G-4-1                         | F           | Subadult/juvenile | < 0.001                      |                   |         |
|                                | <i>Epomops buettikoferi</i>          | 19 Nov 2006                   | C-13-1                        | F           | Adult             | 1.0                          |                   |         |
| <i>Hypsignathus monstrosus</i> | <i>Hypsignathus monstrosus</i>       | 19 Nov 2006                   | C-12-1                        | F           | Adult             | +                            |                   |         |
|                                |                                      | 27 Nov 2008                   | L-3-1                         | M           | Subadult/juvenile | 0.02                         |                   |         |
|                                |                                      | 18 Dec 2008                   | G-4-2                         | F           | Adult             | 0.09                         |                   |         |
|                                |                                      | 19 Dec 2008                   | G-4-3                         | F           | Adult (lactating) | < 0.001                      |                   |         |
|                                |                                      | 19 Dec 2008                   | G-4-1                         | F           | Adult (lactating) | 0.4                          |                   |         |
|                                |                                      | 12 Nov 2010                   | L-2-1                         | F           | Adult             | < 0.001                      |                   |         |
|                                |                                      | 14 Nov 2006                   | C-5-1                         | F           | Subadult/juvenile | < 0.001                      |                   |         |
|                                |                                      | 19 Nov 2006                   | C-12-1                        | F           | Adult (lactating) | +                            |                   |         |
|                                |                                      | 23 Nov 2006                   | C-8-1                         | F           | Subadult/juvenile | < 0.001                      |                   |         |
|                                |                                      | 19 Nov 2010                   | L-2-1                         | M           | Adult             | 0.04                         |                   |         |
|                                |                                      | 23 Nov 2010                   | L-4-1                         | F           | Adult             | < 0.001                      |                   |         |
|                                |                                      | <i>Micropteropus pusillus</i> | <i>Micropteropus pusillus</i> | 03 Dec 2008 | G-1-8             | F                            | Adult (lactating) | < 0.001 |
|                                |                                      |                               |                               | 03 Dec 2008 | G-1-4             | F                            | Subadult/juvenile | 0.3     |
|                                |                                      |                               |                               | 03 Dec 2008 | G-1-9             | M                            | Adult             | 0.06    |
|                                |                                      |                               |                               | 03 Dec 2008 | G-1-7             | F                            | Adult             | 0.6     |
|                                |                                      |                               |                               | 03 Dec 2008 | G-1-11            | F                            | Adult             | < 0.001 |
|                                |                                      |                               |                               | 03 Dec 2008 | G-1-12            | F                            | Adult             | 0.03    |
|                                |                                      |                               |                               | 03 Dec 2008 | G-1-1             | M                            | Adult             | 0.01    |
|                                |                                      |                               |                               | 03 Dec 2008 | G-1-13            | F                            | Adult (lactating) | < 0.001 |
|                                |                                      |                               |                               | 03 Dec 2008 | G-1-3             | F                            | Adult             | 0.01    |
|                                |                                      |                               |                               | 03 Dec 2008 | G-1-6             | M                            | Adult             | 0.1     |
|                                |                                      |                               |                               | 03 Dec 2008 | G-1-10            | F                            | Adult             | < 0.001 |
|                                |                                      |                               |                               | 03 Dec 2008 | G-1-14            | F                            | Adult             | +       |
|                                |                                      |                               |                               | 03 Dec 2008 | G-1-2             | F                            | Adult (lactating) | < 0.001 |
|                                |                                      |                               |                               | 04 Dec 2008 | G-1-15            | F                            | Adult             | 0.08    |
|                                |                                      |                               |                               | 04 Dec 2008 | G-1-16            | F                            | Adult (lactating) | 0.02    |
|                                |                                      | <i>Hepatocystis</i>           | <i>Micropteropus pusillus</i> | 04 Dec 2008 | G-1-17            | F                            | Adult             | < 0.001 |
| 04 Dec 2008                    | G-1-5                                |                               |                               | M           | Adult             | 0.07                         |                   |         |
| 06 Dec 2008                    | G-2-4                                |                               |                               | F           | Adult             | +                            |                   |         |
| 06 Dec 2008                    | G-2-1                                |                               |                               | F           | Adult             | 0.04                         |                   |         |
| 06 Dec 2008                    | G-2-2                                |                               |                               | F           | Adult             | 0.06                         |                   |         |
| 06 Dec 2008                    | G-2-3                                |                               |                               | M           | Adult             | 0.06                         |                   |         |
| 06 Dec 2008                    | G-2-5                                |                               |                               | F           | Adult             | 0.02                         |                   |         |
| 06 Dec 2008                    | G-2-6                                |                               |                               | F           | Adult             | 0.05                         |                   |         |
| 08 Dec 2008                    | G-5-7                                |                               |                               | M           | Adult             | 0.01                         |                   |         |
| 09 Dec 2008                    | G-5-5                                |                               |                               | F           | Adult             | < 0.001                      |                   |         |
| 09 Dec 2008                    | G-5-8                                |                               |                               | F           | Adult (lactating) | < 0.001                      |                   |         |
| 09 Dec 2008                    | G-5-9                                |                               |                               | F           | Adult (lactating) | 0.02                         |                   |         |
| 09 Dec 2008                    | G-5-2                                |                               |                               | F           | Adult (lactating) | 0.07                         |                   |         |
| 09 Dec 2008                    | G-5-3                                |                               |                               | F           | Adult (lactating) | < 0.001                      |                   |         |
| 09 Dec 2008                    | G-5-1                                |                               |                               | M           | Adult             | 0.03                         |                   |         |
| 09 Dec 2008                    | G-5-6                                | F                             | Adult (lactating)             | < 0.001     |                   |                              |                   |         |
| 10 Dec 2008                    | G-5-10                               | M                             | Adult                         | 0.2         |                   |                              |                   |         |
| 10 Dec 2008                    | G-5-11                               | F                             | Adult                         | 0.05        |                   |                              |                   |         |
| 10 Dec 2008                    | G-5-12                               | F                             | Adult                         | < 0.001     |                   |                              |                   |         |
| 10 Dec 2008                    | G-5-4                                | F                             | Adult                         | 0.05        |                   |                              |                   |         |
| 13 Dec 2008                    | G-3-4                                | F                             | Adult (lactating)             | < 0.001     |                   |                              |                   |         |
| 13 Dec 2008                    | G-3-1                                | F                             | Adult (lactating)             | < 0.001     |                   |                              |                   |         |

Table S1. Cont.

| Parasite genus | Host species                   | Date collected* | Code <sup>†</sup> | Sex | Age <sup>‡</sup>  | Parasitemia (%) <sup>§</sup> |
|----------------|--------------------------------|-----------------|-------------------|-----|-------------------|------------------------------|
|                |                                | 13 Dec 2008     | G-3-3             | M   | Adult             | 0.02                         |
|                |                                | 14 Dec 2008     | G-3-2             | F   | Adult             | 0.01                         |
|                |                                | 18 Dec 2008     | G-4-6             | F   | Subadult/juvenile | < 0.001                      |
|                |                                | 18 Dec 2008     | G-4-7             | F   | Adult             | < 0.001                      |
|                |                                | 18 Dec 2008     | G-4-8             | M   | Adult             | +                            |
|                |                                | 18 Dec 2008     | G-4-9             | M   | Adult             | < 0.001                      |
|                |                                | 18 Dec 2008     | G-4-10            | F   | Adult (lactating) | < 0.001                      |
|                |                                | 18 Dec 2008     | G-4-2             | F   | Subadult/juvenile | 0.02                         |
|                |                                | 18 Dec 2008     | G-4-11            | F   | Adult             | 0.05                         |
|                |                                | 18 Dec 2008     | G-4-12            | F   | Subadult/juvenile | 0.04                         |
|                |                                | 18 Dec 2008     | G-4-13            | F   | Subadult/juvenile | 0.02                         |
|                |                                | 18 Dec 2008     | G-4-14            | F   | Adult             | < 0.001                      |
|                |                                | 18 Dec 2008     | G-4-15            | M   | Adult             | < 0.001                      |
|                |                                | 18 Dec 2008     | G-4-16            | F   | Adult (lactating) | 0.02                         |
|                |                                | 18 Dec 2008     | G-4-17            | F   | Adult             | 0.06                         |
|                |                                | 18 Dec 2008     | G-4-4             | F   | Adult             | 0.05                         |
|                |                                | 18 Dec 2008     | G-4-18            | M   | Adult             | 0.05                         |
|                |                                | 18 Dec 2008     | G-4-1             | F   | Adult (lactating) | < 0.001                      |
|                |                                | 18 Dec 2008     | G-4-19            | F   | Adult             | < 0.001                      |
|                |                                | 18 Dec 2008     | G-4-5             | F   | Adult (lactating) | 0.05                         |
|                |                                | 19 Dec 2008     | G-4-20            | M   | Adult             | 0.07                         |
|                |                                | 19 Dec 2008     | G-4-21            | F   | Subadult/juvenile | < 0.001                      |
|                |                                | 19 Dec 2008     | G-4-22            | F   | Adult (lactating) | 0.01                         |
|                |                                | 19 Dec 2008     | G-4-23            | F   | Adult (lactating) | < 0.001                      |
|                | <i>Micropteropus pusillus</i>  | 19 Dec 2008     | G-4-24            | F   | Adult (lactating) | 0.01                         |
|                |                                | 19 Dec 2008     | G-4-3             | F   | Adult (lactating) | < 0.001                      |
|                |                                | 19 Dec 2008     | G-4-25            | F   | Subadult/juvenile | 0.01                         |
|                |                                | 19 Dec 2008     | G-4-26            | F   | Subadult/juvenile | < 0.001                      |
|                |                                | 19 Dec 2008     | G-4-27            | F   | Adult (lactating) | < 0.001                      |
|                |                                | 19 Dec 2008     | G-4-1             | M   | Adult             | 0.06                         |
|                | <i>Myonycteris leptodon</i>    | 19 Dec 2008     | G-1-18            | F   | Subadult/juvenile | < 0.001                      |
|                |                                | 08 Nov 2006     | C-4-1             | F   | Adult             | 0.04                         |
|                |                                | 08 Nov 2006     | C-4-2             | M   | Adult             | +                            |
|                |                                | 08 Nov 2006     | C-4-3             | M   | Adult             | 0.002                        |
|                |                                | 18 Nov 2006     | C-13-1            | F   | Adult             | < 0.001                      |
|                |                                | 18 Nov 2006     | C-13-2            | F   | Adult             | +                            |
|                |                                | 22 Nov 2006     | C-8-1             | F   | Subadult/juvenile | +                            |
|                |                                | 22 Nov 2006     | C-7-1             | M   | Adult             | < 0.001                      |
|                |                                | 23 Nov 2006     | C-7-2             | M   | Adult             | +                            |
|                |                                | 18 Nov 2010     | L-2-1             | F   | Adult (pregnant)  | < 0.001                      |
|                |                                | 22 Nov 2010     | L-4-1             | M   | Adult             | 0.03                         |
|                | <i>Nanonycteris veldkampii</i> | 26 Nov 2010     | L-3-1             | M   | Subadult/juvenile | 0.8                          |
|                |                                | 10 Nov 2006     | C-2-1             | F   | Adult             | +                            |
|                |                                | 22 Nov 2006     | C-8-2             | M   | Subadult/juvenile | < 0.001                      |
|                |                                | 23 Nov 2006     | C-8-1             | M   | Adult             | < 0.001                      |
|                |                                | 24 Nov 2006     | C-7-1             | F   | Adult             | +                            |
|                |                                | 01 Dec 2006     | C-11-1            | F   | Adult             | < 0.001                      |
|                |                                | 01 Dec 2010     | L-1-1             | M   | Adult             | < 0.001                      |

\*All bats were captured between dusk (5:30 PM) and late night (3:00 AM).

<sup>†</sup>Coding of captured individuals is according to country (C, Cote d'Ivoire; G, Guinea; L, Liberia), the capture site (see Table S2) and the order of the same species at any given night.

<sup>‡</sup>Age was categorized into two groups, "adult" and "subadult/juvenile." Lactating/pregnant females are labeled in parenthesis.

<sup>§</sup>Parasitemia was determined by microscopic enumeration of infected/total erythrocytes in Giemsa-stained blood films. +, parasite-positive, but parasite-density uncertain because of suboptimal preservation of blood-film. All microscopically identified infected individuals were confirmed by PCR.

**Table S2. GPS coordinates of the sampling locations**

| Country_site | Latitude     | Longitude    | Sampling date |
|--------------|--------------|--------------|---------------|
| C_1 – C_13   | 05°50'00.0"N | 07°21'00.0"W | Nov–Dec 2006  |
| G_1          | 08°33'07.0"N | 08°53'57.1"W | Dec 2008      |
| G_2          | 08°37'08.2"N | 08°37'08.2"W | Dec 2008      |
| G_3          | 08°33'26.5"N | 08°55'16.5"W | Dec 2008      |
| G_4          | 08°35'35.7"N | 08°51'25.8"W | Dec 2008      |
| G_5          | 08°29'35.1"N | 08°53'48.2"W | Dec 2008      |
| L_1          | 05°39'08.3"N | 08°09'45.6"W | Nov–Dec 2010  |
| L_2          | 05°39'23.6"N | 08°11'10.8"W | Nov–Dec 2010  |
| L_3          | 05°41'53.7"N | 08°07'32.6"W | Nov–Dec 2010  |
| L_4          | 05°39'24.2"N | 08°11'26.0"W | Nov–Dec 2010  |

C, Côte d'Ivoire; G, Guinea; L, Liberia. The country and site "code" corresponds with the codes in Fig. 2, and Figs. S2 and S4. The GPS coordinates (geographic reference) for each site are given in decimal degrees.



**Table S3. Primer sequences**

| Primer name       | Sequence (5' – 3') forward primer | Sequence (5' – 3') reverse primer  |
|-------------------|-----------------------------------|------------------------------------|
| <i>Cytb</i>       |                                   |                                    |
| DW2/DW4           | TAATGCCTAGACGTATTCCTGATTATCCAG    | TGTTTGCTTGGGAGCTGTAATCATAATGTG     |
| 3932F/3932R       | GGGTTATGTATTACCTTGGGGTC           | GACCCAAGGTAATACATAACCC             |
| BatMalF3/BatHepR2 | GGATTTAATGTAATGCCTAGACGT          | AATGCTGTATCATACCTAAAGGATT          |
| BatMalF4/BatMalR5 | AATCCTTTAGGGTATGATACAGC           | ATGTTTGCTTGGGAGCTGTAATCAT          |
| HepF3/HepR3       | CTTACCTTGGGGACAAATGAGTTATT        | CTCTAGCACCAATGTCATTTTAAATTG        |
| <i>Cox1</i> *     |                                   |                                    |
| 1989F/BMcox1R2    | CCTGACATGGATGGATAATACTCG          | GCTCCAATTGATAATACAAAATG            |
| BMcox1F1/R1       | TGGACATTATATCTCCATTAAGTACATC      | GCACCAATTGATAATACAAAATG            |
| BMcox1F3/R3       | TGGACATTATATCCACCTTTAAGTACATC     | GCACCAATTGATAAAAACAAAATG           |
| BMcox1F4/R4       | TGGACATTATATCCACCTTAAGTACATC      | GCTCCAATAGATAAAAACAAAATG           |
| cox1F/R           | CTATTTATGGTTTTTCATTTTTATTGGTA     | AGGAATACGTCTAGGCATTACATTTAAATCC    |
| cox1inF/inR       | ATGATATTTACARITTCAYGGWATTATTATG   | GTATTTTCTCGTAATGTTTTACCAAAGAA      |
| cox1midF/midR     | TTATTCTGGTTTTTTGGTCATCCAG         | CTGGATGACCAAAAAACCAGAATAA          |
| <i>Clpc</i>       |                                   |                                    |
| clpcoutF/outR     | GGTAAACTGAATTAGCAAAAATATTA        | GGACGAGCTCCATATAAAGGAT             |
| clpcinF/ inR      | TTAGCTAAACAATATTTGGTTCTG          | GAGCTCCATATAAAGGATTATAAG           |
| <i>EF2</i>        |                                   |                                    |
| EF2F1/R1          | GTTCTGTGAGATCATGAACAAAAC          | CCTTGTAACCAGAACCAAA                |
| <i>ACT1</i>       |                                   |                                    |
| ACT1outF/outR     | ATGGGTGACGAAGAAGTTCAAGC           | TTAGAAGCATTTTCTGTGGACAATACTGG      |
| ACT1inF/inR       | CAAGCTTTAGTTATTGATAATGG           | CCCTCCAGCCAAATCTAATCTCA            |
| <i>ACT2</i>       |                                   |                                    |
| ACT2outF/outR     | ATGCCAGAAGAATCAATAGC              | TTAGAAGCACTTTCTGTGAACGATACTTGGG    |
| ACT2inF/inR       | CCAGCTATGTATGTTAGTATACAGG         | CTTTAATTTTCATAGATGGCGG             |
| <i>ASL</i>        |                                   |                                    |
| ASLoutF/outR      | GSKAARTTTAATGGKGTCTWGG            | GGATTAAYTTTATGAGGCATTG             |
| ASLinF/inR        | GCTGATMAAAARTTTGATTGG             | GAGGCATTGACTACTWCC                 |
| <i>CysPro</i>     |                                   |                                    |
| CysPro_outF/outR  | CAATGAAATGGTAGGTAAAAATGGT         | CAATGAAATGGTAGGTAAAAATGGT          |
| CysPro_inF/inR    | GATTTTTCTAAGGAAGAATTTAATAG        | TATTTTTTATCAAAGCTATCTAC            |
| <i>dhfr/ts</i>    |                                   |                                    |
| dhfrF/R           | CAAGATGATAGAACAGGTGTTGGTG         | CCCAATACATGTATAAATTCAGCTG          |
| <i>H2A</i>        |                                   |                                    |
| H2AoutF/outR      | ATGTGACGAAAAGGAAAAACCGG           | TTAATAATCTTGGTTAGCTGTGGC           |
| H2AinF/inR        | GTCGCAAAAAGCTGTTAAGGG             | GTGGCACCTGATTTTAATTGGG             |
| <i>InMPDH</i>     |                                   |                                    |
| InMPDH_F/R        | GCKTCTAAAAGHVAAYAAACAATTAATTGTWGG | RAATYBTTTATTATACATRGYCCATACTSCCCAT |
| <i>P25</i>        |                                   |                                    |
| P25outF/outR      | CTTTTCATATACGCTTTCCTTGG           | TTAAATGATATTTGAAAAATTAG            |
| P25inF/inR        | GGCTCAAATGAGTAACCATTTAG           | GAACATGCTATATATTGAATGTG            |
| <i>UBI</i>        |                                   |                                    |
| UBIoutF/outR      | ATGCAAAATTTTGTGAAAACATTAAC        | TTAGCAACCTCCTTAATCTTAAAC           |
| UBIinF/inR        | GGAAAACTATAACTCTTG                | ATGTAAGGTTGATTCTTTTTG              |

*ACT1*, Actin1; *ACT2*, Actin2; *asl*, adenylosuccinate lyase; *clpc*, caseinolytic protease; *cox1*, cytochrome oxidase I; *cyspro*, cysteine proteinase; *Cytb*, cytochrome b; *dhfr/ts*, dihydrofolate reductase/thymidylate synthase; *ef2a*, elongation factor 2; F, forward primer; H2A, histone H2A; in/mid, inner primer for nested PCR; *InMPDH*, Inosine monophosphate-dehydrogenase; out, outer primer for nested PCR; P25, ookinete surface protein; R, reverse primer; *UBI*, poly-ubiquitin.

\*Primers were used in different combinations of the available forward and reverse primers.

**Table S4. GenBank accession numbers for *cytb*, *cox1*, *clpc*, and *ef2a***

| Parasite                               | Host species                     | Abbreviation in Fig. 2A<br>(and Fig. S2)               | GenBank accession nos. |             |             |              |
|----------------------------------------|----------------------------------|--------------------------------------------------------|------------------------|-------------|-------------|--------------|
|                                        |                                  |                                                        | <i>cytb</i>            | <i>cox1</i> | <i>clpc</i> | <i>ef2a</i>  |
| <b>Leucocytozoon</b>                   |                                  |                                                        |                        |             |             |              |
| <i>L. fringillinarum</i>               | <i>Pipilo chlorurus</i>          | <i>Leucocytozoon</i> spp.                              | NC_012451              | NC_012451   | —           | —            |
| <i>L. sp.</i>                          | <i>Buteo jamaicensis</i>         | <i>Leucocytozoon</i> sp. (2109)                        | EU254518               | EU254563    | EU254609    | —            |
| <i>L. sp.</i>                          | <i>Accipiter brevipes</i>        | <i>Leucocytozoon</i> spp. (157)                        | EU254519               | EU254564    | EU254610    | —            |
| <i>L. sp.</i>                          | <i>Buteo lineatus</i>            | <i>Leucocytozoon</i> sp. (2208)                        | EU254520               | EU254565    | EU254611    | —            |
| <b>Haemoproteus</b>                    |                                  |                                                        |                        |             |             |              |
| <i>H. columbae</i>                     | <i>Columba livia</i>             | <i>Haemoproteus columbae</i> (2111)                    | EU254548               | —           | EU254642    | —            |
| <i>H. columbae</i>                     | <i>Columba livia</i>             | <i>Haemoproteus columbae</i> (2146)                    | EU254553               | —           | EU254652    | —            |
| <i>Haemoproteus</i> (Parahaemoproteus) |                                  |                                                        |                        |             |             |              |
| <i>H. belopolskyi</i>                  | <i>Sylvia curruca</i>            | <i>Haemoproteus belopolskyi</i>                        | DQ451408               | EU254603    | EU254657    | —            |
| <i>H. coatneyi</i>                     | <i>Dendroica coronata</i>        | <i>Haemoproteus coatneyi</i>                           | EU254550               | EU254595    | EU254648    | —            |
| <i>H. turtur</i>                       | <i>Streptopelia senegalensis</i> | <i>Haemoproteus turtur</i>                             | DQ451425               | EU254592    | EU254644    | —            |
| <b>Plasmodium</b>                      |                                  |                                                        |                        |             |             |              |
| <b>Avian Plasmodium</b>                |                                  |                                                        |                        |             |             |              |
| <i>P. gallinaceum</i>                  | <i>Gallus gallus</i>             | <i>Avian Plasmodium</i> ssp.<br><i>P. gallinaceum</i>  | AY099029               | AB564275    | AB649424    | —            |
| <i>P. relictum</i>                     | <i>Hemignathus virens</i>        | <i>Avian Plasmodium</i> ssp.<br><i>P. relictum</i>     | AY733090               | AY733090    | EU254633    | —            |
| <b>Saurian Plasmodium</b>              |                                  |                                                        |                        |             |             |              |
| <i>P. azurophilum</i>                  | <i>Anolis oculatus</i>           | <i>Plasmodium azurophilum</i>                          | EU254532               | EU254575    | EU254622    | JN187876     |
| <i>P. chiricahuae</i>                  | <i>Sceloporus jarrovi</i>        | <i>Plasmodium chiricahuae</i>                          | AY099061               | KF049536    | KF049558    | —            |
| <i>P. floridense</i>                   | <i>Anolis oculatus</i>           | <i>Saurian Plasmodium</i> ssp.<br><i>P. floridense</i> | EF079654               | EF079654    | EU254620    | JN187874     |
| <i>P. giganteum</i>                    | <i>Agama agama</i>               | <i>Plasmodium giganteum</i>                            | AY099053               | EU254577    | EU254624    | —            |
| <i>P. hispaniolae</i>                  | <i>Anolis distichus</i>          | <i>Plasmodium hispaniolae</i>                          | JN187902               | JN187863    | —           | JN187881     |
| <i>P. lacertiliae</i>                  | <i>Emoia longicauda</i>          | <i>Plasmodium lacertiliae</i>                          | EU834709               | EU834714    | —           | —            |
| <i>P. leucocytica</i>                  | <i>Anolis oculatus</i>           | <i>Plasmodium leucocytica</i>                          | EU254533               | EU254576    | EU254623    | JN187877     |
| <i>P. mexicanum</i>                    | <i>Sceloporus occidentalis</i>   | <i>Saurian Plasmodium</i> ssp./<br><i>P. mexicanum</i> | EF079653               | EF079653    | EU254619    | —            |
| <i>P. minuoviride</i>                  | <i>Prasinohema prehensicauda</i> | <i>Plasmodium minuoviride</i>                          | EU834703               | EU834711    | —           | —            |
| <b>Mammalian Plasmodium</b>            |                                  |                                                        |                        |             |             |              |
| <b>Primate Plasmodium</b>              |                                  |                                                        |                        |             |             |              |
| <i>P. coatneyi</i>                     | Thailand macaques                | <i>Plasmodium coatneyi</i>                             | EU400407               | AB354575    | AB471872    | —            |
| <i>P. cynomolgi</i>                    | Old World Monkeys                | <i>Plasmodium cynomolgi</i>                            | AF069616               | AB444126    | AB471873    | —            |
| <i>P. falciparum</i>                   | Humans                           | <i>Plasmodium falciparum</i>                           | DQ642845               | M76611      | DQ642846    | AB023579     |
| <i>P. fieldi</i>                       | Old World Monkeys                | <i>Plasmodium fieldi</i>                               | AB354574               | AB354574    | AB471874    | —            |
| <i>P. gaboni</i>                       | <i>Pan troglodytes</i>           | <i>Plasmodium gaboni</i>                               | FJ895307               | FJ895307    | HQ842630    | —            |
| <i>P. gonderi</i>                      | Old World Monkeys                | <i>Plasmodium gonderi</i>                              | AF069622               | AB434918    | AB471877    | —            |
| <i>P. hylobati</i>                     | <i>Hylobates moloch</i>          | <i>Plasmodium hylobati</i>                             | AB354573               | AB354573    | AB471878    | —            |
| <i>P. inui</i>                         | Old World Monkeys                | <i>Plasmodium inui</i>                                 | AF069617               | AB354572    | AB471879    | —            |
| <i>P. knowlesi</i>                     | Old World Monkeys                | <i>Plasmodium knowlesi</i>                             | AF069621               | AY598141    | AF348341    | XM_002260326 |
| <i>P. malariae</i>                     | Humans                           | <i>Plasmodium malariae</i>                             | AF069624               | AB489193    | AF348342    | —            |
| <i>P. ovale</i>                        | Humans                           | <i>Plasmodium ovale</i>                                | AF069625               | JF894415    | AY634623    | —            |
| <i>P. reichenowi</i>                   | <i>Pan troglodytes</i>           | <i>Plasmodium reichenowi</i>                           | AJ251941               | AJ251941    | EU560464    | —            |
| <i>P. simiovale</i>                    | Old World Monkeys                | <i>Plasmodium simiovale</i>                            | AF069614               | —           | AB471881    | —            |
| <i>P. simium</i>                       | <i>Alouatta fuscus</i>           | <i>Plasmodium simium</i>                               | AF069620               | —           | —           | —            |
| <i>P. vivax</i>                        | Humans                           | <i>Plasmodium vivax</i>                                | AF069619               | AA Y26841   | AF348344    | XM_001615828 |
| <i>P. sp.</i>                          | <i>Pan troglodytes</i>           | Ex. Chimp_C1                                           | HM235391               | HM235391    | HM235147    | —            |
| <i>P. sp.</i>                          | <i>Pan troglodytes</i>           | Ex. Chimp_C2                                           | HM235404               | HM235400    | HM235145    | —            |
| <i>P. sp.</i>                          | <i>Pan troglodytes</i>           | Ex. Chimp_C3                                           | HM235360               | HM235360    | HM235151    | —            |
| <i>P. sp.</i>                          | <i>Gorilla gorilla</i>           | Ex. Gorilla_G1                                         | HM235288               | HM235308    | HM235163    | —            |
| <i>P. sp.</i>                          | <i>Gorilla gorilla</i>           | Ex. Gorilla_G2                                         | HM234984               | HM235383    | HM235148    | —            |
| <i>P. sp.</i>                          | <i>Gorilla gorilla</i>           | Ex. Gorilla_G3                                         | HM234998               | HM235290    | HM235154    | —            |
| <i>P. sp.</i>                          | <i>Propithecus verreauxi</i>     | Ex. <i>Propithecus verreauxi</i> (Sifaka)              | AY762079               | —           | —           | —            |
| <b>Rodent Plasmodium</b>               |                                  |                                                        |                        |             |             |              |
| <i>P. atheruri</i>                     | <i>Atherurus africanus</i>       | <i>P. atheruri</i>                                     | AY099051               | DQ414588    | DQ417611    | —            |

Table S4. Cont.

| Parasite                                   | Host species                           | Abbreviation in Fig. 2A<br>(and Fig. S2)               | GenBank accession nos. |                 |                 |                  |
|--------------------------------------------|----------------------------------------|--------------------------------------------------------|------------------------|-----------------|-----------------|------------------|
|                                            |                                        |                                                        | <i>cytb</i>            | <i>cox1</i>     | <i>clpc</i>     | <i>ef2a</i>      |
| <i>P. berghei</i> (Anka)                   | <i>Grammomys surdaster</i> *           | <b><i>Plasmodium berghei</i> (Anka)</b>                | <b>DQ414645</b>        | <b>DQ414589</b> | <b>DQ417612</b> | —                |
| <i>P. berghei</i> (NK65)                   | <i>G. surdaster</i> *                  | <i>P. berghei</i> NK65                                 | DQ414646               | DQ414590        | DQ417613        | —                |
| <i>P. chabaudi</i><br><i>adami</i> (408XZ) | <i>Thamnomys rutilans</i> <sup>†</sup> | <i>P. chabaudi adami</i> 408XZ                         | DQ414647               | DQ414591        | DQ417614        | —                |
| <i>P. chabaudi</i><br><i>adami</i> (556KA) | <i>T. rutilans</i> <sup>†</sup>        | <i>P. chabaudi adami</i> 556KA                         | DQ414648               | DQ414592        | DQ417615        | —                |
| <i>P. chabaudi</i><br><i>chabaudi</i> (AS) | <i>T. rutilans</i> <sup>†</sup>        | <b><i>Plasmodium chabaudi</i> (AS)</b>                 | <b>DQ414649</b>        | <b>DQ414593</b> | <b>DQ417616</b> | <b>XM_736543</b> |
| <i>P. chabaudi</i><br><i>chabaudi</i> (CB) | <i>T. rutilans</i> <sup>†</sup>        | <i>P. chabaudi chabaudi</i> CB                         | AY099050               | DQ414594        | DQ417617        | —                |
| <i>P. vincke</i><br><i>brucechwatti</i>    | <i>Praomys tullbergi</i>               | <i>P. vincke brucechwatti</i>                          | DQ414652               | DQ414597        | DQ417620        | —                |
| <i>P. vincke</i><br><i>lentum</i> (194ZZ)  | <i>T. rutilans</i> <sup>†</sup>        | <i>P. vincke lentum</i> 194ZZ                          | DQ414653               | DQ414598        | DQ417621        | —                |
| <i>P. vincke</i><br><i>lentum</i> (408XZ)  | <i>T. rutilans</i> <sup>†</sup>        | <i>P. vincke lentum</i> 408XZ                          | DQ414654               | DQ414599        | DQ417622        | —                |
| <i>P. vincke</i><br><i>petteri</i> (BS)    | <i>T. rutilans</i> <sup>†</sup>        | <i>P. vincke petteri</i> BS                            | DQ414655               | DQ414600        | DQ417623        | —                |
| <i>P. vincke</i><br><i>petteri</i> (CR)    | <i>T. rutilans</i> <sup>†</sup>        | <i>P. vincke petteri</i> CR                            | DQ414656               | DQ414601        | DQ417624        | —                |
| <i>P. vincke vincke</i><br>(VIBA CyPI)     | <i>G. surdaster</i> *                  | <b><i>Plasmodium vincke</i> (VIBA CyPI)</b>            | <b>DQ414651</b>        | <b>DQ414596</b> | <b>DQ417619</b> | —                |
| <i>P. vincke</i> ("EL")                    | <i>Thamnomys</i> sp.                   | <i>P. vincke</i> EL                                    | DQ414650               | DQ414595        | DQ417618        | —                |
| <i>P. yoelii yoelii</i> (17X)              | <i>T. rutilans</i> <sup>†</sup>        | <i>P. yoelii yoelii</i> 17X                            | AY099051               | DQ414605        | DQ417628        | —                |
| <i>P. yoelii yoelii</i> (33x)              | <i>T. rutilans</i> <sup>†</sup>        | <b><i>Plasmodium yoelii</i> (33x)</b>                  | <b>DQ414660</b>        | <b>DQ414606</b> | <b>DQ417630</b> | —                |
| <i>P. yoelii</i> (EL)                      | <i>T. rutilans</i> <sup>†</sup>        | <i>P. yoelii</i> EL                                    | DQ414657               | DQ414602        | DQ417625        | —                |
| <i>P. yoelii killicki</i>                  | <i>T. rutilans</i> <sup>†</sup>        | <i>P. yoelii Killicki</i> 193L                         | DQ414658               | DQ414603        | DQ417626        | —                |
| <i>P. yoelii nigeriensis</i>               | <i>T. rutilans</i> <sup>†</sup>        | <i>P. yoelii nigeriensis</i> N67                       | DQ414659               | DQ414604        | DQ417627        | —                |
| <b>Bat Plasmodium</b>                      |                                        |                                                        |                        |                 |                 |                  |
| <i>P. cyclopsi</i>                         | <i>Hipposideros cyclops</i>            | <b>Ex. <i>Hipposideros cyclops</i> (L-1-1)</b>         | <b>KF159710</b>        | <b>KF159788</b> | <b>KF159635</b> | <b>KF159729</b>  |
| <i>P. cyclopsi</i>                         | <i>Hipposideros cyclops</i>            | <b>Ex. <i>Hipposideros cyclops</i> (L-4-1)</b>         | <b>KF159674</b>        | <b>KF159789</b> | <b>KF159630</b> | <b>KF159728</b>  |
| <i>P. cyclopsi</i>                         | <i>Hipposideros cyclops</i>            | <b>Ex. <i>Hipposideros cyclops</i> (L-4-2)</b>         | <b>KF159716</b>        | <b>KF159791</b> | <b>KF159637</b> | <b>F</b>         |
| <i>P. voltaicum</i>                        | <i>Myonycteris angolensis</i>          | <b>Ex. <i>Myonycteris angolensis</i> (G-1-1)</b>       | <b>KF159671</b>        | <b>KF159792</b> | <b>KF159648</b> | <b>F</b>         |
| <i>P. voltaicum</i>                        | <i>Myonycteris angolensis</i>          | <b>Ex. <i>Myonycteris angolensis</i> (G-3-1)</b>       | <b>F</b>               | <b>F</b>        | <b>KF159634</b> | <b>F</b>         |
| <i>P. voltaicum</i>                        | <i>Myonycteris angolensis</i>          | <b>Ex. <i>Myonycteris angolensis</i> (G-5-1)</b>       | <b>KF159692</b>        | <b>KF159793</b> | <b>F</b>        | <b>F</b>         |
| <b>Hepatocystis</b>                        |                                        |                                                        |                        |                 |                 |                  |
| <b>Primate Hepatocystis</b>                |                                        |                                                        |                        |                 |                 |                  |
| <i>Hep. sp.</i>                            | <i>Cercopithecus cephus</i>            | <b>Ex. <i>Cercopithecus cephus</i> (Gabon/GAB_1)</b>   | <b>JF923760</b>        | —               | —               | —                |
| <i>Hep. sp.</i>                            | <i>Cercopithecus cephus</i>            | <b>Ex. <i>Cercopithecus cephus</i> (Gabon/GAB_2)</b>   | <b>JF923758</b>        | —               | —               | —                |
| <i>Hep. sp.</i>                            | <i>Cercopithecus nictitans</i>         | <b>Ex. <i>Cercopithecus nictitans</i> (Cambodia)_1</b> | <b>JQ070884</b>        | —               | —               | —                |
| <i>Hep. sp.</i>                            | <i>Cercopithecus nictitans</i>         | <b>Ex. <i>Cercopithecus nictitans</i> (CAM_2)</b>      | <b>JQ070893</b>        | —               | —               | —                |
| <i>Hep. sp.</i>                            | <i>Cercopithecus nictitans</i>         | <b>Ex. <i>Cercopithecus nictitans</i> (CAM_3)</b>      | <b>JQ070872</b>        | —               | —               | —                |
| <i>Hep. sp.</i>                            | <i>Cercopithecus nictitans</i>         | <b>Ex. <i>Cercopithecus nictitans</i> (CAM_4)</b>      | <b>JQ070903</b>        | —               | —               | —                |
| <i>Hep. sp.</i>                            | <i>Cercopithecus nictitans</i>         | <b>Ex. <i>Cercopithecus nictitans</i> (CAM_5)</b>      | <b>JQ070940</b>        | —               | —               | —                |
| <i>Hep. sp.</i>                            | <i>Cercopithecus nictitans</i>         | <b>Ex. <i>Cercopithecus nictitans</i> (CAM_6)</b>      | <b>JQ070922</b>        | —               | —               | —                |
| <i>Hep. sp.</i>                            | <i>Cercopithecus nictitans</i>         | <b>Ex. <i>Cercopithecus nictitans</i> (CAM_7)</b>      | <b>JQ070892</b>        | —               | —               | —                |
| <i>Hep. sp.</i>                            | <i>Cercopithecus nictitans</i>         | <b>Ex. <i>Cercopithecus nictitans</i> (CAM_8)</b>      | <b>JQ070926</b>        | —               | —               | —                |
| <i>Hep. sp.</i>                            | <i>Cercopithecus nictitans</i>         | <b>Ex. <i>Cercopithecus nictitans</i> (CAM_9)</b>      | <b>JQ070897</b>        | —               | —               | —                |
| <i>Hep. sp.</i>                            | <i>Cercopithecus nictitans</i>         | <b>Ex. <i>Cercopithecus nictitans</i> (CAM_10)</b>     | <b>JQ070925</b>        | —               | —               | —                |

Table S4. Cont.

| Parasite                | Host species                  | Abbreviation in Fig. 2A<br>(and Fig. S2)              | GenBank accession nos. |             |             |             |
|-------------------------|-------------------------------|-------------------------------------------------------|------------------------|-------------|-------------|-------------|
|                         |                               |                                                       | <i>cytb</i>            | <i>cox1</i> | <i>clpc</i> | <i>ef2a</i> |
| <i>Hep. sp.</i>         | <i>Macaca sp.</i>             | Ex. <i>Macaca sp.</i> (MYA_1)                         | GU930064               | —           | —           | —           |
| <i>Hep. sp.</i>         | <i>Macaca sp.</i>             | Ex. <i>Macaca sp.</i> (THA_1)                         | GU930051               | —           | —           | —           |
| <i>Hep. sp.</i>         | <i>Macaca sp.</i>             | Ex. <i>Macaca sp.</i> (THA_2)                         | EU400409               | —           | —           | —           |
| <i>Hep. sp.</i>         | <i>Macaca sp.</i>             | Ex. <i>Macaca sp.</i> (THA_3)                         | GU930042               | —           | —           | —           |
| <i>Hep. sp.</i>         | <i>Mandrillus sphinx</i>      | Ex. <i>Mandrillus sphinx</i><br>(Gabon/GAB_1)         | JF923759               | —           | —           | —           |
| <i>Hep. sp.</i>         | <i>Miopithecus talapoin</i>   | Ex. <i>Miopithecus talapoin</i> (GAB_2)               | JF923757               | —           | —           | —           |
| <i>Hep. sp.</i>         | <i>Papio nubensis</i>         | Ex. <i>Papio nubensis</i><br>(Ethiopia/ETH_1)         | AF069626               | —           | —           | —           |
| Bat <i>Hepatocystis</i> |                               |                                                       |                        |             |             |             |
| <i>Hep. sp.</i>         | <i>Cynopterus brachyotis</i>  | Ex. <i>Cynopterus brachyotis</i><br>(Singapore/SIN_1) | EU254526               | EU254569    | EU254616    | —           |
| <i>Hep. sp.</i>         | <i>Cynopterus brachyotis</i>  | Ex. <i>Cynopterus brachyotis</i><br>(Singapore/SIN_2) | AY099030               | —           | —           | —           |
| <i>Hep. sp.</i>         | <i>Cynopterus horsfieldii</i> | Ex. <i>Cynopterus horsfieldii</i><br>(Borneo/BOR_1)   | DQ396527               | —           | —           | —           |
| <i>Hep. sp.</i>         | <i>Cynopterus horsfieldii</i> | Ex. <i>Cynopterus horsfieldii</i><br>(Borneo/BOR_2)   | DQ396528               | —           | —           | —           |
| <i>Hep. sp.</i>         | <i>Epomophorus gambianus</i>  | Ex. <i>Epomophorus gambianus</i> (G-4-1)              | KF159695               | F           | F           | F           |
| <i>Hep. sp.</i>         | <i>Epomops buettikoferi</i>   | Ex. <i>Epomops buettikoferi</i> (G-4-1)               | KF159701               | KF159768    | KF159636    | F           |
| <i>Hep. sp.</i>         | <i>Epomops buettikoferi</i>   | Ex. <i>Epomops buettikoferi</i> (G-4-2)               | KF159706               | KF159779    | KF159612    | KF159757    |
| <i>Hep. sp.</i>         | <i>Epomops buettikoferi</i>   | Ex. <i>Epomops buettikoferi</i> (G-4-3)               | KF159703               | KF159790    | F           | F           |
| <i>Hep. sp.</i>         | <i>Epomops buettikoferi</i>   | Ex. <i>Epomops buettikoferi</i> (C-13-1)              | KF188067               | F           | F           | F           |
| <i>Hep. sp.</i>         | <i>Epomops buettikoferi</i>   | Ex. <i>Epomops buettikoferi</i> (L-2-1)               | KF159694               | KF159798    | F           | F           |
| <i>Hep. sp.</i>         | <i>Epomops buettikoferi</i>   | Ex. <i>Epomops buettikoferi</i> (L-4-1)               | F                      | F           | F           | KF159741    |
| <i>Hep. sp.</i>         | <i>Hipposideros larvatus</i>  | Ex. <i>Hipposideros larvatus</i> (CAM_1)              | EF179356               | —           | —           | —           |
| <i>Hep. sp.</i>         | <i>Hypsiphanes monstrosus</i> | Ex. <i>Hypsiphanes monstrosus</i> (L-2-1)             | KF159689               | KF159799    | F           | KF159734    |
| <i>Hep. sp.</i>         | <i>Hypsiphanes monstrosus</i> | Ex. <i>Hypsiphanes monstrosus</i> (L-4-1)             | KF159712               | F           | KF159647    | F           |
| <i>Hep. sp.</i>         | <i>Micropteropus pusillus</i> | Ex. <i>Micropteropus pusillus</i> (G-1-1)             | KF159691               | KF159800    | KF159614    | F           |
| <i>Hep. sp.</i>         | <i>Micropteropus pusillus</i> | Ex. <i>Micropteropus pusillus</i> (G-1-2)             | KF159688               | KF159758    | KF159621    | F           |
| <i>Hep. sp.</i>         | <i>Micropteropus pusillus</i> | Ex. <i>Micropteropus pusillus</i> (G-1-3)             | KF188068               | KF188070    | F           | KF188072    |
| <i>Hep. sp.</i>         | <i>Micropteropus pusillus</i> | Ex. <i>Micropteropus pusillus</i> (G-1-4)             | KF159713               | KF159759    | KF159622    | KF159738    |
| <i>Hep. sp.</i>         | <i>Micropteropus pusillus</i> | Ex. <i>Micropteropus pusillus</i> (G-1-5)             | KF159677               | KF159760    | KF159620    | KF159736    |
| <i>Hep. sp.</i>         | <i>Micropteropus pusillus</i> | Ex. <i>Micropteropus pusillus</i> (G-1-6)             | KF159718               | KF159761    | KF159613    | KF159722    |
| <i>Hep. sp.</i>         | <i>Micropteropus pusillus</i> | Ex. <i>Micropteropus pusillus</i> (G-1-7)             | KF159719               | KF159762    | F           | KF159725    |
| <i>Hep. sp.</i>         | <i>Micropteropus pusillus</i> | Ex. <i>Micropteropus pusillus</i> (G-1-8)             | KF159686               | KF159763    | KF159646    | KF159727    |
| <i>Hep. sp.</i>         | <i>Micropteropus pusillus</i> | Ex. <i>Micropteropus pusillus</i> (G-1-9)             | KF159702               | KF159764    | KF159643    | KF159745    |
| <i>Hep. sp.</i>         | <i>Micropteropus pusillus</i> | Ex. <i>Micropteropus pusillus</i> (G-1-10)            | KF159683               | KF159801    | KF159623    | KF159744    |
| <i>Hep. sp.</i>         | <i>Micropteropus pusillus</i> | Ex. <i>Micropteropus pusillus</i> (G-1-11)            | KF159682               | KF159802    | KF159632    | KF159732    |
| <i>Hep. sp.</i>         | <i>Micropteropus pusillus</i> | Ex. <i>Micropteropus pusillus</i> (G-1-12)            | KF159711               | KF159803    | KF159624    | KF159743    |
| <i>Hep. sp.</i>         | <i>Micropteropus pusillus</i> | Ex. <i>Micropteropus pusillus</i> (G-2-1)             | KF159670               | F           | KF159619    | KF159752    |
| <i>Hep. sp.</i>         | <i>Micropteropus pusillus</i> | Ex. <i>Micropteropus pusillus</i> (G-2-2)             | KF159709               | KF159765    | KF159644    | F           |
| <i>Hep. sp.</i>         | <i>Micropteropus pusillus</i> | Ex. <i>Micropteropus pusillus</i> (G-2-3)             | KF159685               | KF159766    | KF159627    | KF159747    |
| <i>Hep. sp.</i>         | <i>Micropteropus pusillus</i> | Ex. <i>Micropteropus pusillus</i> (G-2-4)             | KF159708               | KF159767    | KF159638    | KF159739    |
| <i>Hep. sp.</i>         | <i>Micropteropus pusillus</i> | Ex. <i>Micropteropus pusillus</i> (G-3-1)             | KF159696               | KF159769    | KF159640    | KF159724    |
| <i>Hep. sp.</i>         | <i>Micropteropus pusillus</i> | Ex. <i>Micropteropus pusillus</i> (G-3-2)             | KF159669               | KF159770    | KF159617    | KF159726    |
| <i>Hep. sp.</i>         | <i>Micropteropus pusillus</i> | Ex. <i>Micropteropus pusillus</i> (G-3-3)             | KF159697               | KF159771    | KF159629    | KF159737    |
| <i>Hep. sp.</i>         | <i>Micropteropus pusillus</i> | Ex. <i>Micropteropus pusillus</i> (G-4-1)             | KF159679               | KF159772    | KF159615    | F           |
| <i>Hep. sp.</i>         | <i>Micropteropus pusillus</i> | Ex. <i>Micropteropus pusillus</i> (G-4-2)             | KF159693               | KF159773    | KF159645    | KF159746    |
| <i>Hep. sp.</i>         | <i>Micropteropus pusillus</i> | Ex. <i>Micropteropus pusillus</i> (G-4-3)             | KF159672               | KF159774    | KF159633    | KF159730    |
| <i>Hep. sp.</i>         | <i>Micropteropus pusillus</i> | Ex. <i>Micropteropus pusillus</i> (G-4-4)             | F                      | F           | KF159628    | F           |
| <i>Hep. sp.</i>         | <i>Micropteropus pusillus</i> | Ex. <i>Micropteropus pusillus</i> (G-4-5)             | KF159704               | KF159775    | KF159618    | KF159753    |
| <i>Hep. sp.</i>         | <i>Micropteropus pusillus</i> | Ex. <i>Micropteropus pusillus</i> (G-4-6)             | F                      | F           | F           | KF159735    |
| <i>Hep. sp.</i>         | <i>Micropteropus pusillus</i> | Ex. <i>Micropteropus pusillus</i> (G-5-1)             | KF159717               | F           | F           | KF159748    |
| <i>Hep. sp.</i>         | <i>Micropteropus pusillus</i> | Ex. <i>Micropteropus pusillus</i> (G-5-2)             | KF159676               | KF159776    | KF159626    | F           |
| <i>Hep. sp.</i>         | <i>Micropteropus pusillus</i> | Ex. <i>Micropteropus pusillus</i> (G-5-3)             | F                      | KF159777    | KF159625    | KF159721    |
| <i>Hep. sp.</i>         | <i>Micropteropus pusillus</i> | Ex. <i>Micropteropus pusillus</i> (G-5-4)             | KF159680               | KF159778    | KF159641    | KF159723    |
| <i>Hep. sp.</i>         | <i>Micropteropus pusillus</i> | Ex. <i>Micropteropus pusillus</i> (G-5-5)             | KF159673               | KF159780    | F           | KF159733    |
| <i>Hep. sp.</i>         | <i>Micropteropus pusillus</i> | Ex. <i>Micropteropus pusillus</i> (G-5-6)             | KF159687               | KF159781    | KF159649    | KF159756    |

Table S4. Cont.

| Parasite                  | Host species                         | Abbreviation in Fig. 2A<br>(and Fig. S2)                 | GenBank accession nos. |                 |                 |                 |
|---------------------------|--------------------------------------|----------------------------------------------------------|------------------------|-----------------|-----------------|-----------------|
|                           |                                      |                                                          | <i>cytb</i>            | <i>cox1</i>     | <i>clpc</i>     | <i>ef2a</i>     |
| <i>Hep. sp.</i>           | <i>Myonycteris leptodon</i>          | Ex. <b><i>Myonycteris leptodon</i> (C-7-1)</b>           | <b>KF188066</b>        | <b>KF188069</b> | <b>F</b>        | <b>KF188071</b> |
| <i>Hep. sp.</i>           | <i>Myonycteris leptodon</i>          | Ex. <b><i>Myonycteris leptodon</i> (C-7-2)</b>           | <b>F</b>               | <b>KF159782</b> | <b>F</b>        | <b>F</b>        |
| <i>Hep. sp.</i>           | <i>Myonycteris leptodon</i>          | Ex. <b><i>Myonycteris leptodon</i> (L-2-1)</b>           | <b>KF159707</b>        | <b>KF159783</b> | <b>F</b>        | <b>KF159755</b> |
| <i>Hep. sp.</i>           | <i>Myonycteris leptodon</i>          | Ex. <b><i>Myonycteris leptodon</i> (L-3-1)</b>           | <b>KF159705</b>        | <b>N</b>        | <b>F</b>        | <b>KF159754</b> |
| <i>Hep. sp.</i>           | <i>Myonycteris leptodon</i>          | Ex. <b><i>Myonycteris leptodon</i> (L-4-1)</b>           | <b>KF159678</b>        | <b>KF159784</b> | <b>F</b>        | <b>KF159750</b> |
| <i>Hep. sp.</i>           | <i>Nanonycteris veldkampii</i>       | Ex. <b><i>Nanonycteris veldkampii</i> (C-8-1)</b>        | <b>KF159684</b>        | <b>KF159785</b> | <b>F</b>        | <b>F</b>        |
| <i>Hep. sp.</i>           | <i>Nanonycteris veldkampii</i>       | Ex. <b><i>Nanonycteris veldkampii</i> (C-8-2)</b>        | <b>KF159715</b>        | <b>F</b>        | <b>F</b>        | <b>F</b>        |
| <i>Hep. sp.</i>           | <i>Nanonycteris veldkampii</i>       | Ex. <b><i>Nanonycteris veldkampii</i> (L-1-1)</b>        | <b>KF159698</b>        | <b>KF159786</b> | <b>KF159631</b> | <b>KF159749</b> |
| <i>Hep. sp.</i>           | <i>Nanonycteris veldkampii</i>       | Ex. <b><i>Nanonycteris veldkampii</i> (Guinea/GUI_1)</b> | <b>EU254528</b>        | <b>EU254571</b> | <b>EU254618</b> | <b>—</b>        |
| <i>Hep. sp.</i>           | <i>Nanonycteris veldkampii</i>       | Ex. <b><i>Nanonycteris veldkampii</i> (Guinea/GUI_2)</b> | <b>EU254527</b>        | <b>EU254570</b> | <b>EU254617</b> | <b>—</b>        |
| <i>Hep. sp.</i>           | <i>Pteropus hypomelanus</i>          | Ex. <b><i>Pteropus hypomelanus</i> (Malaysia/MAL_1)</b>  | <b>FJ168565</b>        | <b>FJ168565</b> | <b>—</b>        | <b>—</b>        |
| <i>Hep. sp.</i>           | <i>Pteropus vampyrus</i>             | Ex. <b><i>Pteropus vampyrus</i> (Borneo/BOR_1)</b>       | <b>DQ396530</b>        | <b>—</b>        | <b>—</b>        | <b>—</b>        |
| <i>Hep. sp.</i>           | <i>Pteropus vampyrus</i>             | Ex. <b><i>Pteropus vampyrus</i> (Borneo/BOR_2)</b>       | <b>DQ396531</b>        | <b>—</b>        | <b>—</b>        | <b>—</b>        |
| <b>Polychromophilus</b>   |                                      |                                                          |                        |                 |                 |                 |
| <i>Poly. melanipherus</i> | <i>Miniopterus schreibersii</i>      | <b><i>Polychromophilus melanipherus</i> (_3)</b>         | <b>JN990708</b>        | <b>JN990714</b> | <b>JN990720</b> | <b>—</b>        |
| <i>Poly. melanipherus</i> | <i>Miniopterus schreibersii</i>      | <b><i>Polychromophilus melanipherus</i> (_4)</b>         | <b>JN990709</b>        | <b>JN990715</b> | <b>JN990721</b> | <b>—</b>        |
| <i>Poly. melanipherus</i> | <i>Miniopterus schreibersii</i>      | <b><i>Polychromophilus melanipherus</i> (_5)</b>         | <b>JN990710</b>        | <b>JN990716</b> | <b>JN990722</b> | <b>—</b>        |
| <i>Poly. melanipherus</i> | <i>Miniopterus schreibersii</i>      | <b><i>Polychromophilus melanipherus</i> (_6)</b>         | <b>JN990711</b>        | <b>JN990717</b> | <b>—</b>        | <b>—</b>        |
| <i>Poly. murinus</i>      | <i>Myotis daubentonii</i>            | <b><i>Polychromophilus murinus</i> (_1)</b>              | <b>HM05583</b>         | <b>JN990718</b> | <b>JN990723</b> | <b>—</b>        |
| <i>Poly. murinus</i>      | <i>Myotis daubentonii</i>            | <b><i>Polychromophilus murinus</i> (_2)</b>              | <b>HM05584</b>         | <b>JN990719</b> | <b>JN990724</b> | <b>—</b>        |
| <i>Poly. murinus</i>      | <i>Myotis daubentonii</i>            | <b><i>Polychromophilus murinus</i> (_3)</b>              | <b>HM05585</b>         | <b>—</b>        | <b>—</b>        | <b>—</b>        |
| <i>Poly. murinus</i>      | <i>Myotis daubentonii</i>            | <b><i>Polychromophilus murinus</i> (_4)</b>              | <b>HM05586</b>         | <b>—</b>        | <b>—</b>        | <b>—</b>        |
| <i>Poly. murinus</i>      | <i>Myotis daubentonii</i>            | <b><i>Polychromophilus murinus</i> (_5)</b>              | <b>HM05587</b>         | <b>—</b>        | <b>—</b>        | <b>—</b>        |
| <i>Poly. murinus</i>      | <i>Myotis daubentonii</i>            | <b><i>Polychromophilus murinus</i> (_6)</b>              | <b>HM05588</b>         | <b>—</b>        | <b>—</b>        | <b>—</b>        |
| <i>Poly. murinus</i>      | <i>Myotis daubentonii</i>            | Ex. <b><i>Myotis daubentoni_7</i></b>                    | <b>HM05589</b>         | <b>—</b>        | <b>—</b>        | <b>—</b>        |
| <i>Poly. sp.</i>          | <i>Myotis goudoti</i>                | Ex. <b><i>Myotis goudoti</i> (Madagascar)</b>            | <b>AY762072</b>        | <b>—</b>        | <b>—</b>        | <b>—</b>        |
| <i>Poly. sp.</i>          | <i>Miniopterus manavi</i>            | Ex. <b>Min_manavi (Madagascar) _MAD1</b>                 | <b>AY762070</b>        | <b>—</b>        | <b>—</b>        | <b>—</b>        |
| <i>Poly. sp.</i>          | <i>Miniopterus manavi</i>            | Ex. <b>Min_manavi (Madagascar) _MAD2</b>                 | <b>AY762071</b>        | <b>—</b>        | <b>—</b>        | <b>—</b>        |
| <i>Poly. sp.</i>          | <i>Miniopterus manavi</i>            | Ex. <b>Min_manavi (Madagascar) _MAD3</b>                 | <b>AY762074</b>        | <b>—</b>        | <b>—</b>        | <b>—</b>        |
| <i>Poly. sp.</i>          | <i>Kerivoula hardwickii</i>          | Ex. <b><i>Kerivoula hardwickii</i> (Cambodia)_CAM1</b>   | <b>EF179354</b>        | <b>—</b>        | <b>—</b>        | <b>—</b>        |
| <i>Poly. sp.</i>          | <i>Miniopterus villiersi</i>         | Ex. <b><i>Miniopterus villiersi</i> (G-3-1)</b>          | <b>KF159675</b>        | <b>KF159794</b> | <b>F</b>        | <b>F</b>        |
| <i>Poly. sp.</i>          | <i>Miniopterus villiersi</i>         | Ex. <b><i>Miniopterus villiersi</i> (G-3-2)</b>          | <b>KF159699</b>        | <b>KF159795</b> | <b>KF159616</b> | <b>KF159740</b> |
| <i>Poly. sp.</i>          | <i>Miniopterus villiersi</i>         | Ex. <b><i>Miniopterus villiersi</i> (G-3-3)</b>          | <b>KF159681</b>        | <b>KF159796</b> | <b>KF159642</b> | <b>KF159731</b> |
| <i>Poly. sp.</i>          | <i>Neoromicia capensis</i>           | Ex. <b><i>Neoromicia capensis</i> (G-3-1)</b>            | <b>KF159700</b>        | <b>F</b>        | <b>F</b>        | <b>F</b>        |
| <i>Poly. sp.</i>          | <i>Pipistrellus aff. grandidieri</i> | Ex. <b><i>Pipistrellus grandidieri</i> (G-3-1)</b>       | <b>KF159714</b>        | <b>KF159797</b> | <b>KF159639</b> | <b>KF159742</b> |
| <b>Nycteria</b>           |                                      |                                                          |                        |                 |                 |                 |
| <i>N. sp.</i>             | <i>Rhinolophus alcyone</i>           | Ex. <b><i>Rhinolophus alcyone</i> (C-9-1)</b>            | <b>KF159720</b>        | <b>F</b>        | <b>F</b>        | <b>KF159751</b> |
| <i>N. sp.</i>             | <i>Rhinolophus landeri</i>           | Ex. <b><i>Rhinolophus landeri</i> (G-3-1)</b>            | <b>KF159690</b>        | <b>KF159787</b> | <b>F</b>        | <b>F</b>        |
| <i>Haemosporida sp.</i>   | <i>Megaderma spasma</i>              | Ex. <b><i>Megaderma spasma</i> (Cambodia)</b>            | <b>EF179355</b>        | <b>—</b>        | <b>—</b>        | <b>—</b>        |

Samples/accession numbers in bold have been included in the analysis for both Fig. 2A and Fig. S2. F, failed to amplify. Sequences from this study are highlighted in red. A dash signifies the sequence is not available/not attempted to amplify.

\**Grammomys surdaster* = *Grammomys dolichurus*.

†*Thamnomys rutilans* = *Grammomys poensis*.



Table S5. Cont.

| Plasmodium species    | Hosts species                   | Abbreviation in Fig. 2B and Fig. S4       | GenBank accession numbers* |          |          |          |          |          |          |          |          |   |
|-----------------------|---------------------------------|-------------------------------------------|----------------------------|----------|----------|----------|----------|----------|----------|----------|----------|---|
|                       |                                 |                                           | Actin-1                    | Actin-2  | asl      | cyspro   | dhfr     | H2A      | InMPPDH  | P25      | UBI      |   |
| <i>P. yoelii</i>      | <i>T. rutilans</i> <sup>‡</sup> | <i>P. yoelii nigeriensis</i> N67          | —                          | —        | —        | DQ414623 | DQ414642 | —        | —        | —        | —        | — |
| <i>P. nigeriensis</i> | <i>Hipposideros cyclops</i>     | <i>Ex. Hipposideros cyclops</i> (L-1-1)   | KF159609                   | KF159650 | F        | F        | F        | KF159658 | F        | KF159663 | KF159664 |   |
| <i>P. cyclopsi</i>    | <i>Hipposideros cyclops</i>     | <i>Ex. Hipposideros cyclops</i> (L-4-1)   | KF159610                   | KF159651 | KF159653 | KF159655 | F        | KF159659 | KF159661 | F        | KF159665 |   |
| <i>P. cyclopsi</i>    | <i>Hipposideros cyclops</i>     | <i>Ex. Hipposideros cyclops</i> (L-4-2)   | KF159611                   | KF159652 | F        | F        | F        | KF159660 | F        | F        | KF159666 |   |
| <i>P. voltaicum</i>   | <i>Myonycteris angolensis</i>   | <i>Ex. Myonycteris angolensis</i> (G-1-1) | F                          | F        | KF159654 | KF159656 | KF159657 | F        | KF159662 | F        | F        |   |

Samples/accession numbers in bold have been included in the analysis for both Fig. 2B and Fig. S4.

\* Additional nine genes included in the analysis for Fig. 2B and Fig. S4 (accession numbers for cytochrome *b*; cytochrome oxidase I; caseinolytic protease and elongation factor 2 are given in Table S4). ACT1, Actin-1; ACT2, Actin-2; asl, adenylosuccinate lyase; cyspro, cysteine proteinase; dhfr1ts, dihydrofolate reductase/thymidylate synthase; F, failed to amplify; H2A, histone H2A; InMPPDH, inosinmonophosphate dehydrogenase; P25, ookinete surface protein; UBI, poly-ubiquitin. Sequences from this study are highlighted in red. A dash represents sequence not available/not attempted.

<sup>‡</sup> *Grammomys surdaster* = *Grammomys dolichurus*.

<sup>§</sup> *Thamnomys rutilans* = *Grammomys poensis*.

<sup>¶</sup> Plasmod.
